# Supplementary material for: Study of multi-electron redox mechanism via electrochromic behavior in hexaazatrinaphthylene-based polymer as the cathode of lithium–organic batteries
Source: Royal Society of Chemistry journal article supplement (doi:10.1039/d1ta07323k), 2021-01-01
Supplement: d1ta07323k1.pdf [file d1ta07323k1.pdf]

## Support information

### Study of Multi-Electron Redox Mechanism via Electrochromic Behavior in Hexaazatriphthylene-Based Polymer as Cathode of Lithium Organic Batteries

Zhangxin Chen,<sup>‡,a,b</sup> Shiwei Mei,<sup>‡,a</sup> Weijun Li<sup>\*,a</sup>, Ning Xu,<sup>a</sup> Yujie Dong,<sup>a</sup> Yanxian Jin<sup>\*,b</sup>, Mi Ouyang,<sup>a</sup> Cheng Zhang<sup>\*,a</sup>

State Key Laboratory Breeding Base for Green Chemistry Synthesis Technology, College of Chemical Engineering, Zhejiang University of Technology, Chaowang Road 18#, Hangzhou, 310014, P. R China.

School of Pharmaceutical and Material Engineering, Taizhou University, Taizhou 318000, China.

‡ These authors contributed equally to this work.

Figure S1

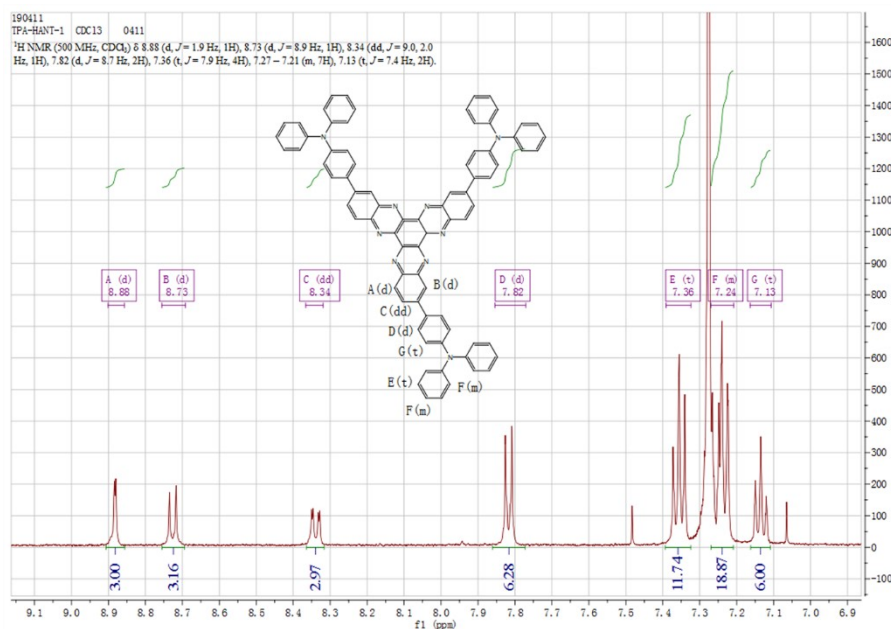

The <sup>1</sup>H NMR of TPA-HATN

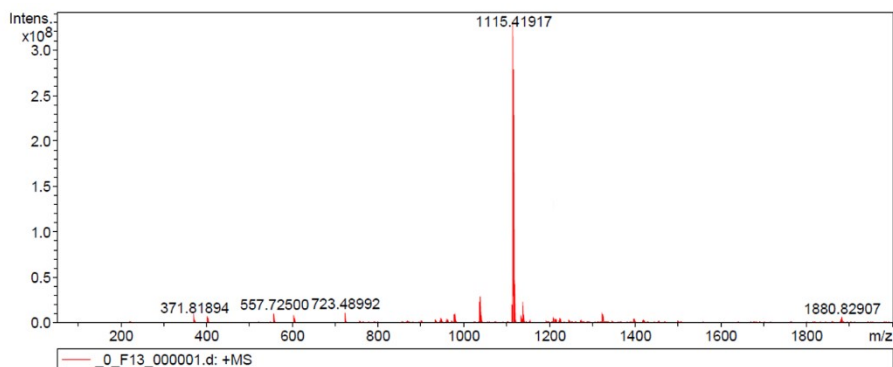

## The MADLI-TOF-MS of TPA-HATN

Figure S2

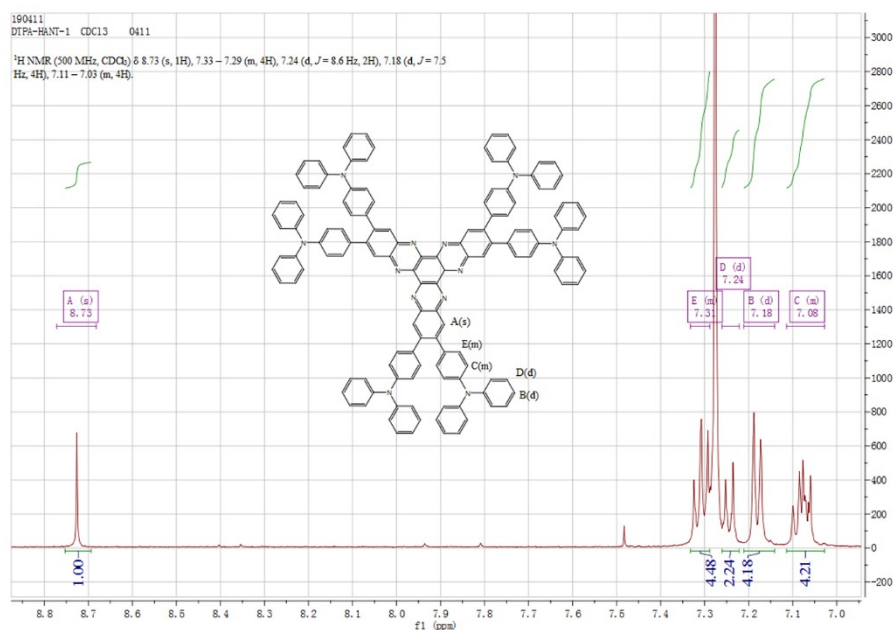

## The <sup>1</sup>H NMR of DTPA-HATN

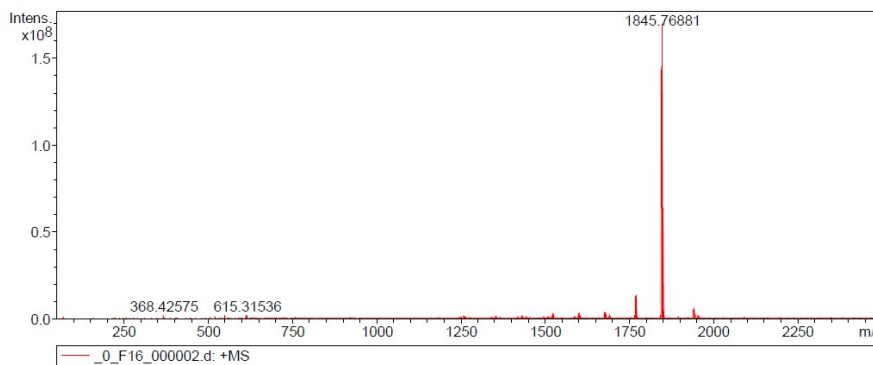

## The MADLI-TOF MS of DTPA-HATN

Figure S3

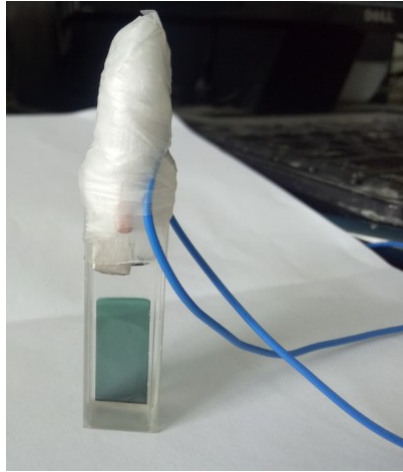

Figure S3. The schematic diagram of microelectrochemical cell open lithium battery test

Figure S4

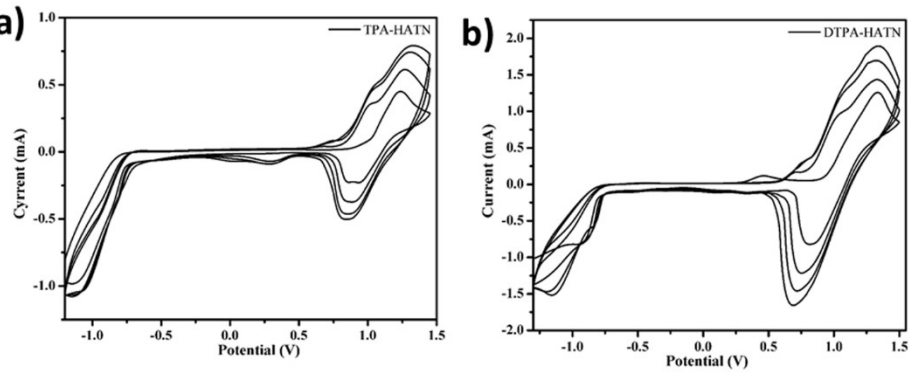

Figure S4. The CV polymerization curve of the TPA-HATN and DTPA-HATN

Figure S5

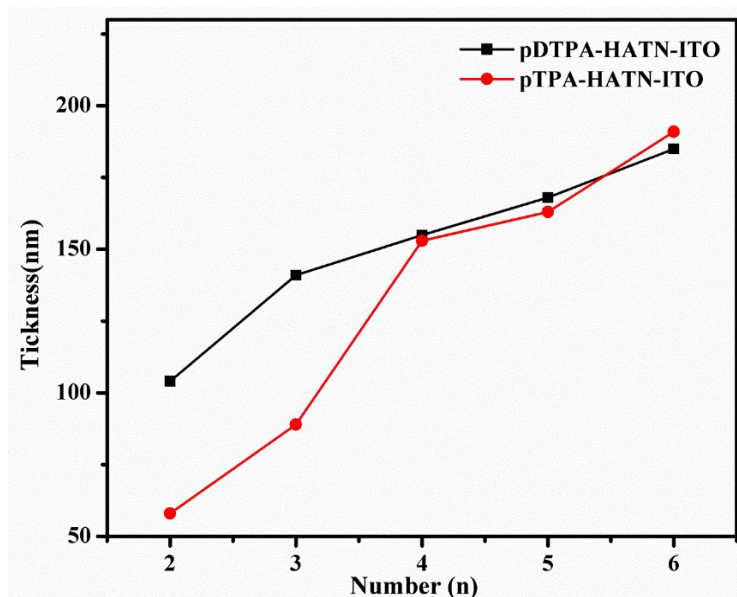

**Figure S5.** The film thickness of PDTPA-HATN and PTPA-HATN under different cyclic voltammogram polymerization cycles

**Figure S6**

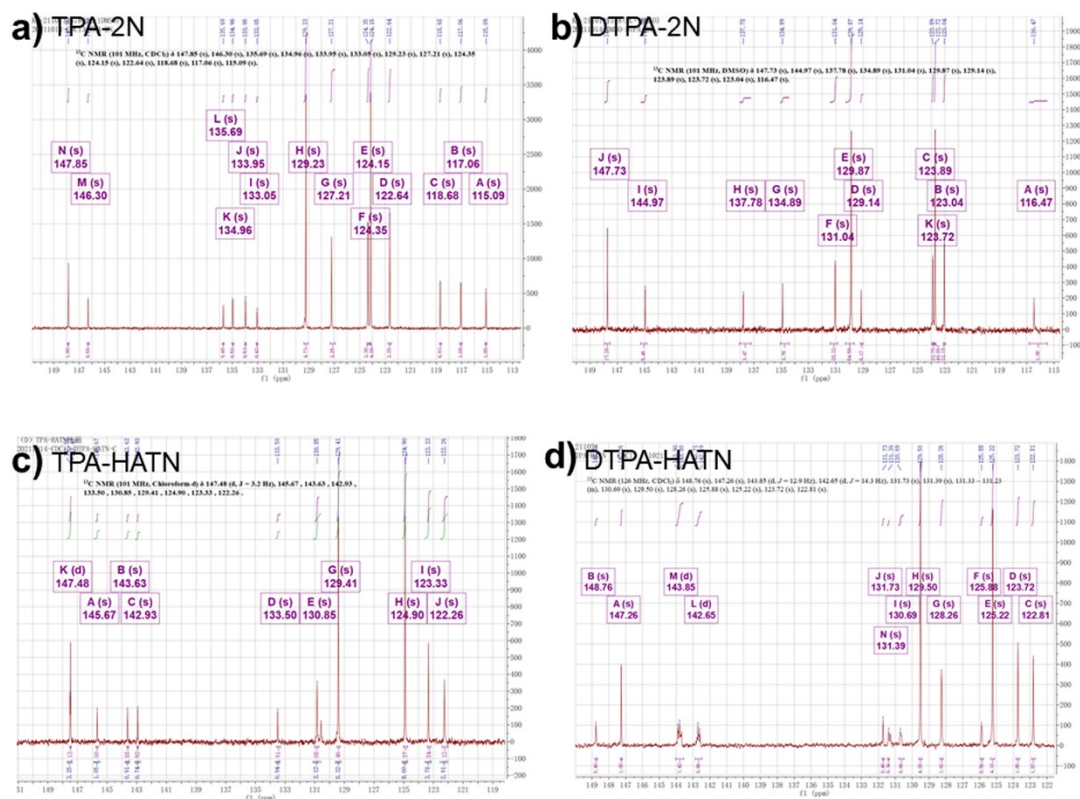

**Figure S6** the <sup>13</sup>C NMR of the TPA-2N, DTPA-2N, TPA-HATN, DTPA-HATN.

**Figure S7**

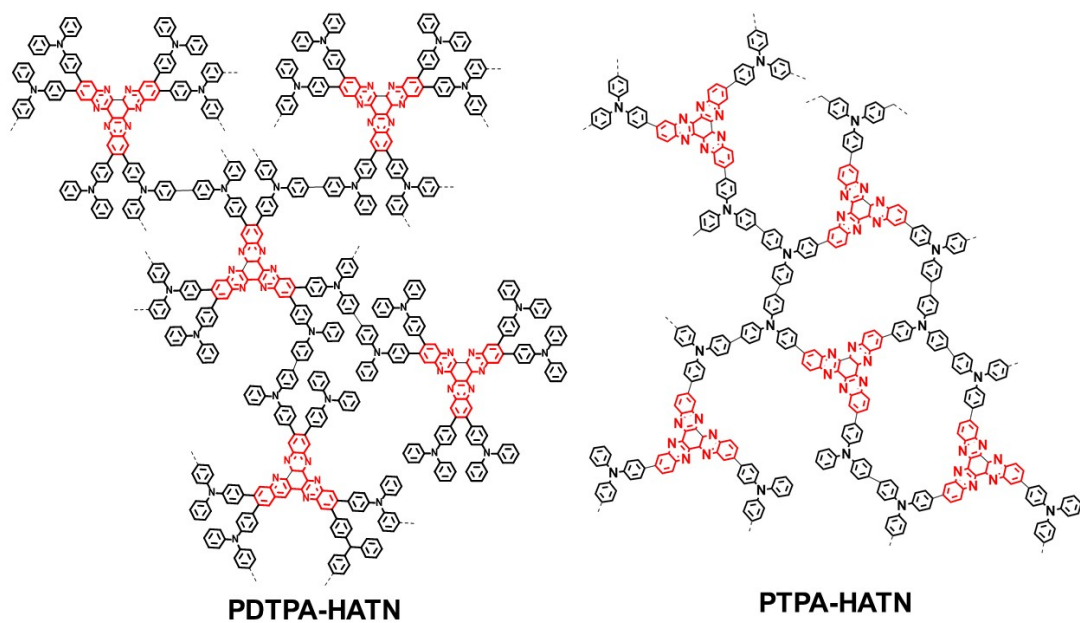

Figure S7 The possible polymers structure of PTPA-HATN and PDTPA-HATN.

Figure S8

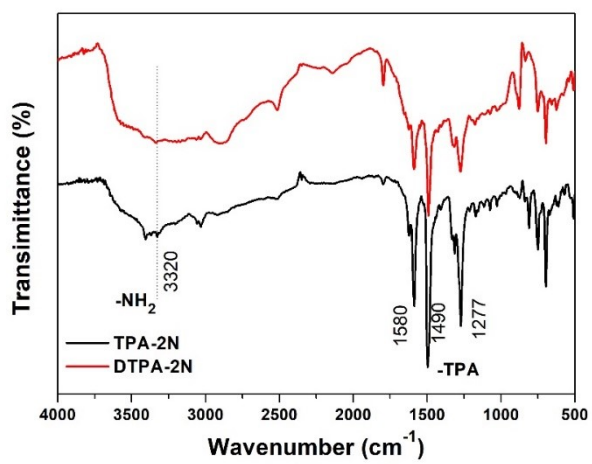

Figure S8. The FT-IR of the TPA-2N and DTPA-2N.

Figure S9

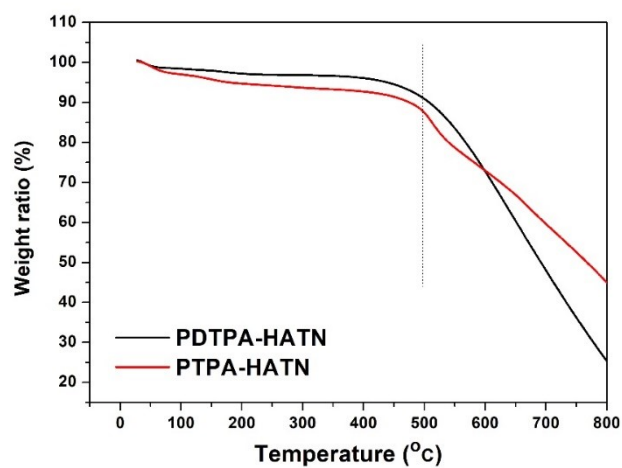

Figure S9 The TGA of the polymers PDTPA-HATN and PTPA-HATN.

Figure S10

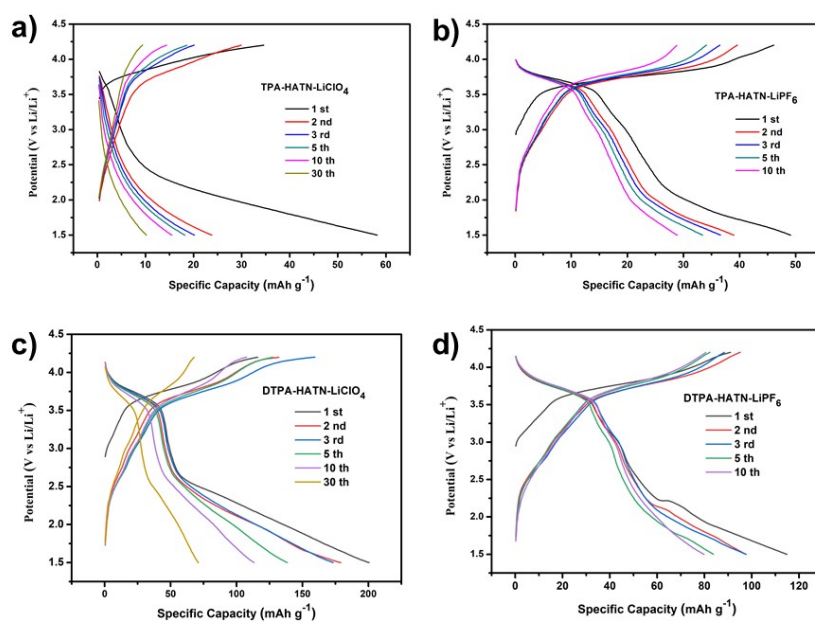

Figure S10 The charge/discharge curves of two monomers TPA-HATN and DTPA-HATN in  $\text{LiClO}_4$  and  $\text{LiPF}_6$  electrolyte

Figure S11

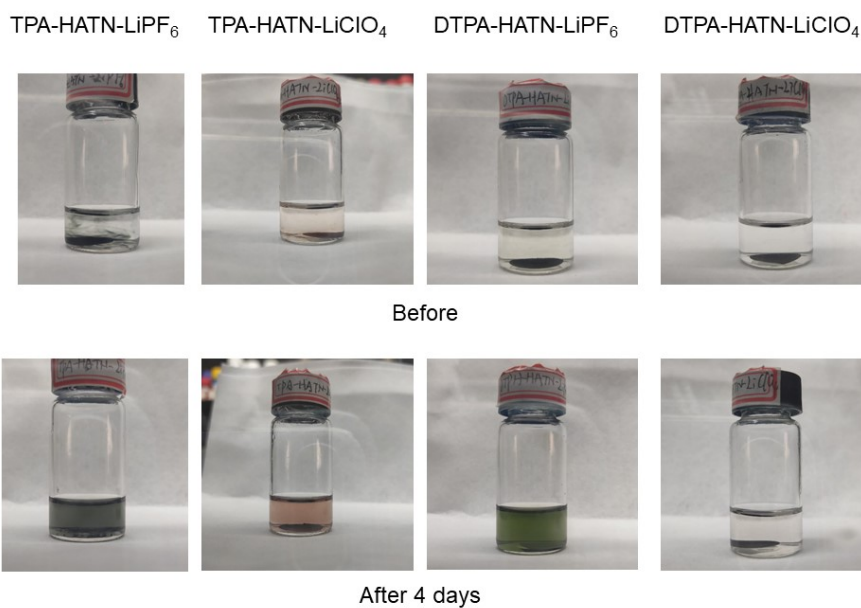

**Figure S11** The solubility tests of two monomer electrodes in electrolyte before and after 4 days.

**Figure S12**

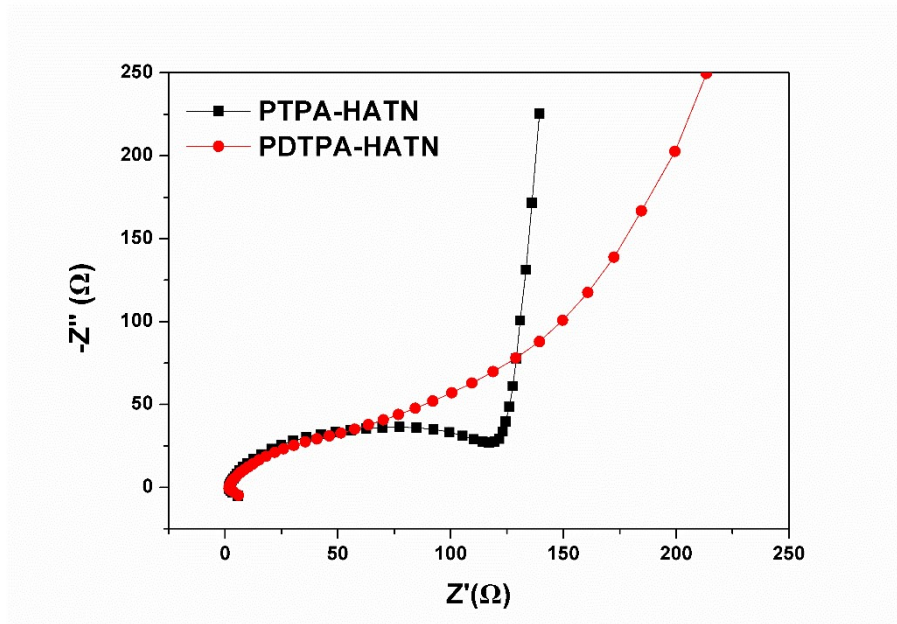

**Figure S12** The EIS measurements of PTPA-HATN and PDTPA for three groups of batteries data

**Figure S13**

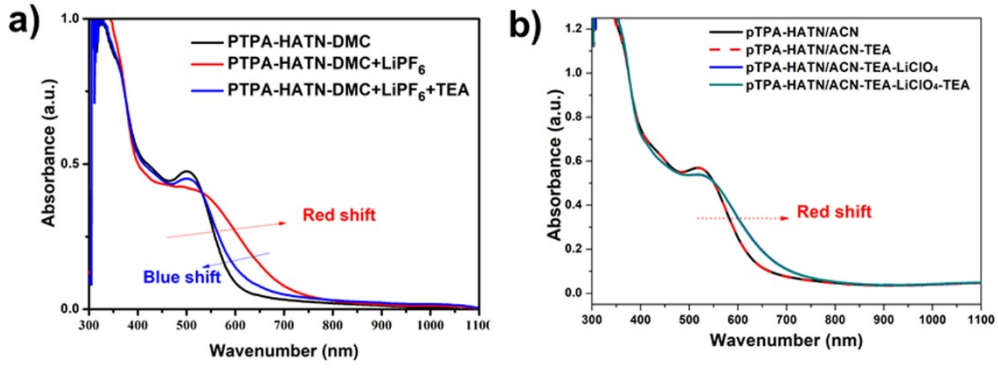

Figure S13 The UV tests of PTPA-HATN film in electrolytes and then added TEA solution.

Figure S14

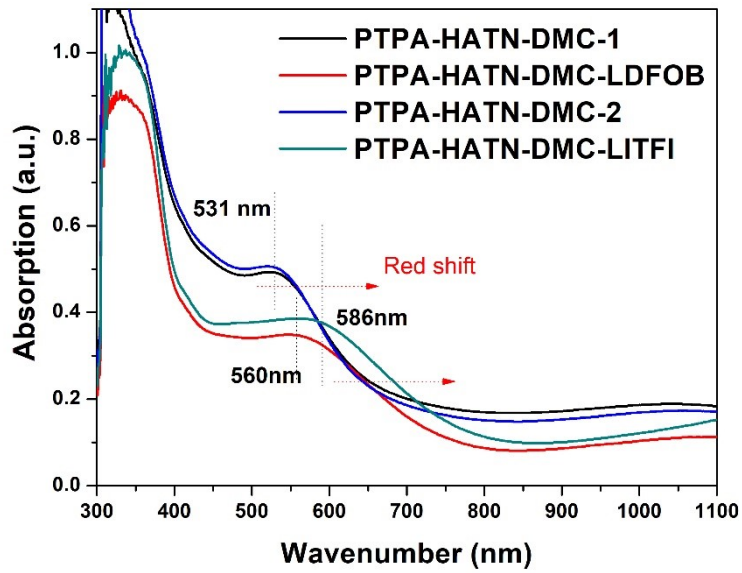

Figure S14 The UV tests of PTPA-HATN film LDFOB and LITFI electrolytes.

Figure S15



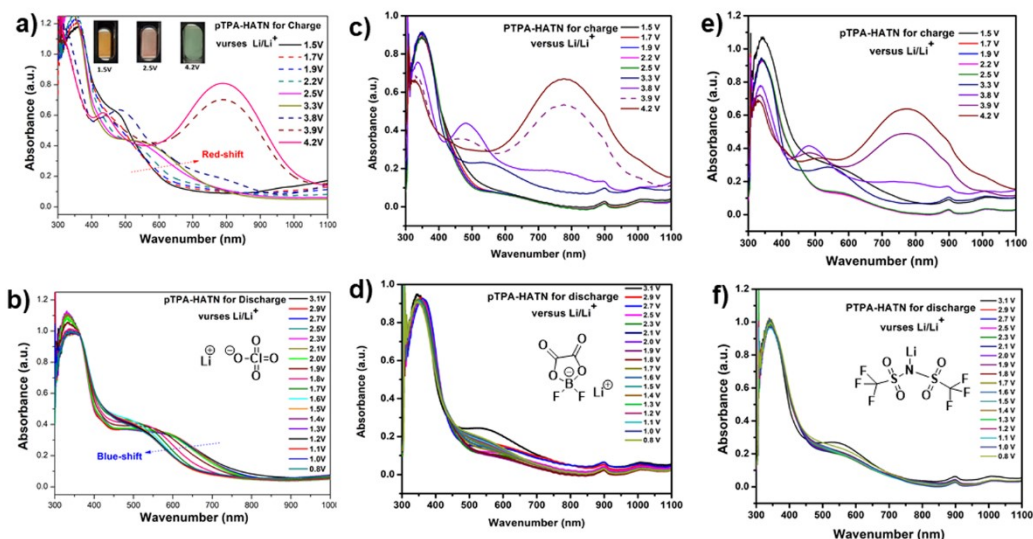

Figure S15 The UV tests of PTPA-HATN film during the charge/discharge process in  $\text{LiClO}_4$ , LDFOB and LITFI electrolytes.

Figure S16

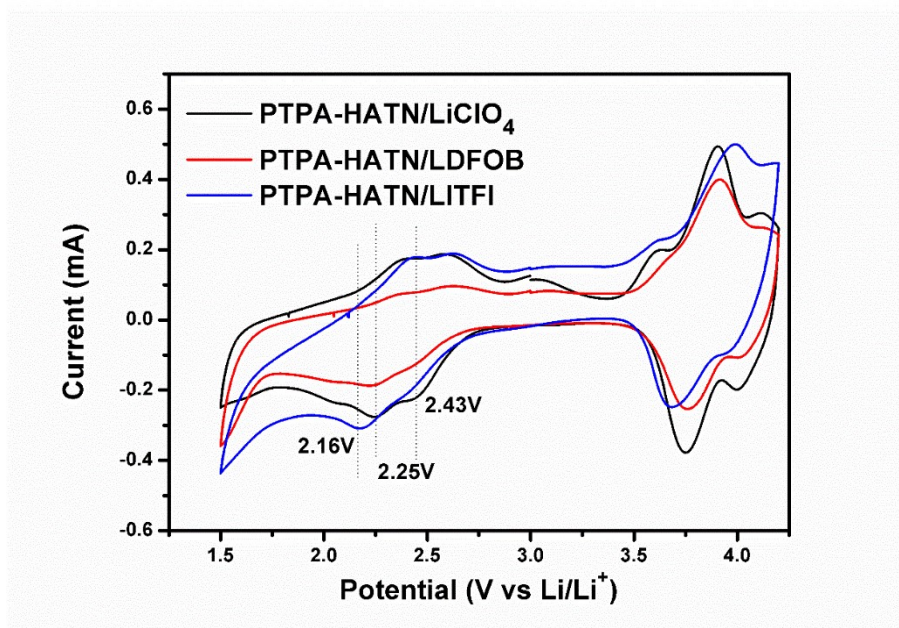

Figure S16 The CV curves of PTPA-HATN electrode in  $\text{LiClO}_4$ , LDFOB, LITFI electrolytes at 5 mV/s
